# Supplementary material
Source: PubMed Central journal article supplement (PMC6830784)
Supplement: ASN.2019030236SupplementaryData.pdf [file ASN.2019030236SupplementaryData.pdf]

## **Supplemental Information**

### **Tolerogenic dendritic cells attenuate experimental autoimmune anti-myeloperoxidase glomerulonephritis**

Dragana Odobasic, Virginie Oudin, Kenji Ito, Poh-Yi Gan, A. Richard Kitching  
and Stephen R. Holdsworth

#### **Supplemental Table of Contents**

Supplemental Tables:

**Supplemental Table 1.** The effect of BAY on DC phospho-I $\kappa$ B $\alpha$  levels and expression of PD-L1.

Supplemental Figures:

**Supplemental Figure 1.** The effect of BAY on DC expression of PD-L1.

**Supplemental Figure 2.** The effect of tolerogenic DCs on antibody levels.

**Supplemental Figure 3.** T cell cytokine production in wildtype or Treg-depleted DREG mice receiving vehicle or MPO/BAY DCs.

**Supplemental Figure 4.** The mechanisms by which MPO/BAY DCs regulate Treg responses.

**Supplemental Figure 5.** The effect of MPO/BAY DC-induced Tregs in the presence or absence of an IL-10R antibody on cytokine production by CD4 T cells.

**Supplemental Table 1.** The effect of DMSO-treated MPO-pulsed DCs on anti-MPO immunity and glomerulonephritis

|                                             | <b>Vehicle<br/>(saline; n = 6)</b> | <b>DMSO<sup>a</sup>-treated MPO-<br/>pulsed DCs<sup>b</sup> (n = 6)</b> | <b><i>P</i> value</b> |
|---------------------------------------------|------------------------------------|-------------------------------------------------------------------------|-----------------------|
| % abnormal glomeruli                        | 48.8 ± 4.4                         | 46.3 ± 7.1                                                              | 0.76                  |
| Proteinuria (µg/24h)                        | 1425 ± 105                         | 1539 ± 276                                                              | 0.69                  |
| Skin DTH <sup>c</sup> (Δmm)                 | 0.2 ± 0.02                         | 0.2 ± 0.03                                                              | 0.46                  |
| CD4 T cells                                 |                                    |                                                                         |                       |
| % Ki-67+ cells                              | 9.5 ± 1.8                          | 7.3 ± 1.0                                                               | 0.30                  |
| % AnV <sup>d</sup> +PI <sup>e</sup> - cells | 10.5 ± 1.4                         | 7.1 ± 0.7                                                               | 0.049                 |
| % IL-17A+ cells                             | 1.2 ± 0.5                          | 0.8 ± 0.2                                                               | 0.41                  |
| IL-17A MFI <sup>f</sup>                     | 195.3 ± 13.1                       | 193.8 ± 20.3                                                            | 0.95                  |
| % IFNγ+ cells                               | 2.3 ± 0.2                          | 2.7 ± 0.3                                                               | 0.26                  |
| IFNγ MFI                                    | 53.0 ± 6.8                         | 41.7 ± 3.8                                                              | 0.18                  |
| % IL-4+ cells                               | 0.2 ± 0.03                         | 0.2 ± 0.02                                                              | 0.34                  |
| IL-4 MFI                                    | 158 ± 22.1                         | 187.7 ± 30.3                                                            | 0.45                  |
| CD8 T cells                                 |                                    |                                                                         |                       |
| % Ki-67+ cells                              | 6.3 ± 1.4                          | 7.5 ± 2.0                                                               | 0.62                  |
| % AnV+PI- cells                             | 2.6 ± 0.3                          | 1.9 ± 0.03                                                              | 0.048                 |
| % IL-17A+ cells                             | 0.3 ± 0.1                          | 0.5 ± 0.1                                                               | 0.25                  |
| IL-17A MFI                                  | 42.5 ± 3.0                         | 47.2 ± 4.9                                                              | 0.43                  |
| % IFNγ+ cells                               | 3.5 ± 0.3                          | 5.0 ± 0.7                                                               | 0.08                  |
| IFNγ MFI                                    | 251.2 ± 27.0                       | 194.2 ± 25.0                                                            | 0.15                  |
| % IL-4+ cells                               | 0.12 ± 0.02                        | 0.29 ± 0.05                                                             | 0.008                 |
| IL-4 MFI                                    | 45.7 ± 5.5                         | 38.2 ± 4.2                                                              | 0.31                  |
| B cells                                     |                                    |                                                                         |                       |
| % Ki-67+ cells                              | 13.2 ± 1.1                         | 16.1 ± 1.3                                                              | 0.11                  |

|                 |            |            |      |
|-----------------|------------|------------|------|
| % AnV+PI- cells | 13.5 ± 1.6 | 10.6 ± 0.7 | 0.13 |
|-----------------|------------|------------|------|

DMSO-treated MPO-pulsed DCs or vehicle (saline) were administered to mice with established anti-MPO immunity (day 14), 7 days before triggering GN. Anti-MPO immunity (in lymph nodes) and disease were assessed on day 26.

<sup>a</sup> DMSO, dimethylsulfoxide.

<sup>b</sup> DCs, dendritic cells.

<sup>c</sup> DTH, delayed type hypersensitivity.

<sup>d</sup> AnV, Annexin V.

<sup>e</sup> PI, propidium iodide.

<sup>f</sup> MFI, mean fluorescence intensity.

Results are presented as the mean ± SEM.

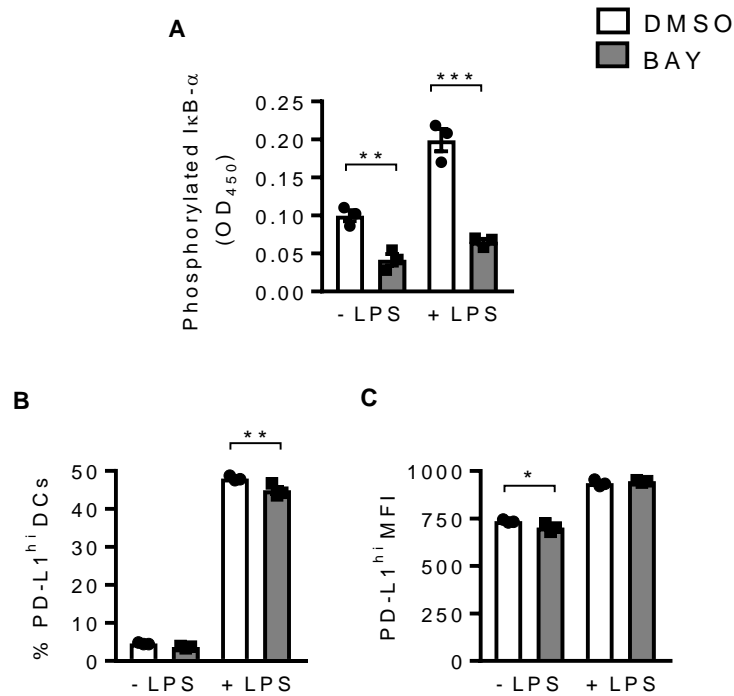

**Supplemental Figure 1.** The effect of BAY on DC phospho-IκBα levels and expression of PD-L1. DMSO or BAY-treated DCs were cultured with or without LPS for 24 hours. Phosphorylated IκBα levels were measured by ELISA using DC lysates, while DC expression of PD-L1 was assessed by flow cytometry. (A) Levels of phosphorylated IκBα. (B) The proportion of DCs expressing PD-L1. (C) The level of DC expression of PD-L1. DC, dendritic cells. LPS, lipopolysaccharide. DMSO, dimethylsulfoxide. MFI, mean fluorescence intensity. Data are presented as scatter plots with the mean ± SEM. \*  $P < 0.05$ , \*\*  $P < 0.01$ , \*\*\*  $P < 0.001$ .

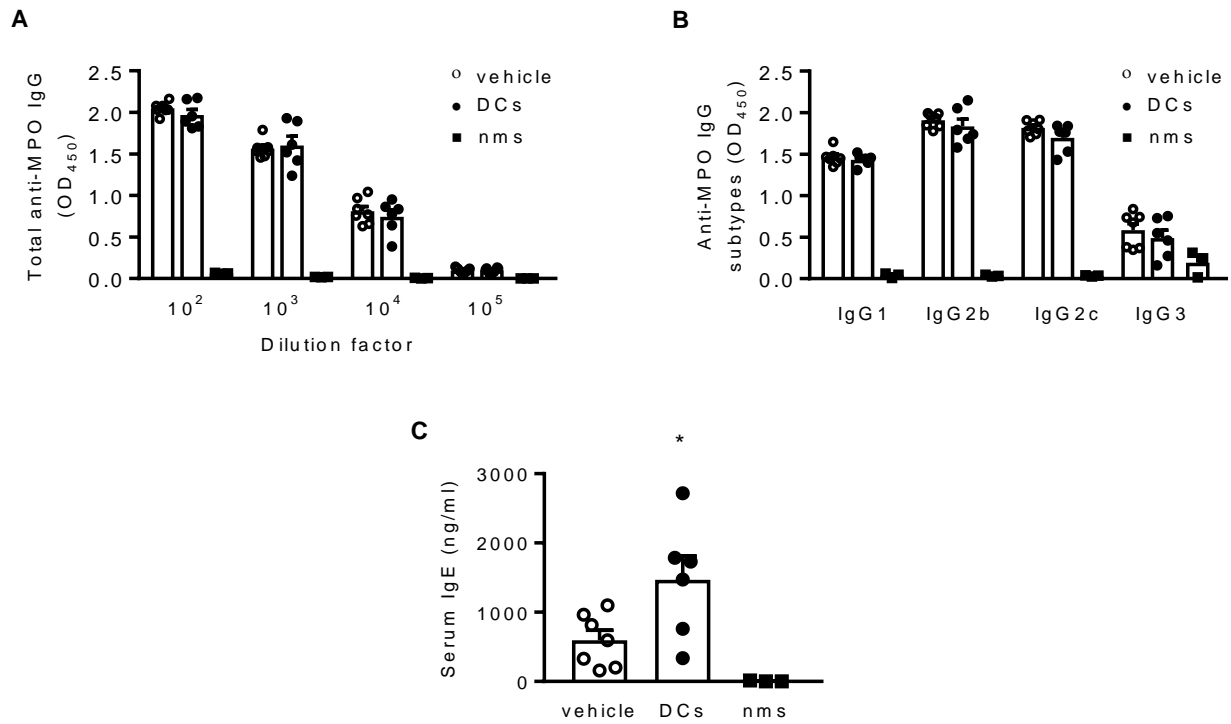

**Supplemental Figure 2.** The effect of tolerogenic DCs on antibody levels. Mice were immunised with MPO/adjuvant (days 0 and 7) and GN triggered on day 21. BAY-treated MPO-exposed DCs (MPO/BAY DCs;  $n = 6$ ) or vehicle (saline;  $n = 7$ ) were administered on day 14 and serum anti-MPO antibody titres and total IgE levels measured by ELISA on day 26. (A) Total anti-MPO IgG. (B) Anti-MPO IgG subtypes (at 1/100 dilution). (C) Total IgE. Data are presented as scatter plots with the mean  $\pm$  SEM. nms, normal mouse serum.

\*  $P < 0.05$ .

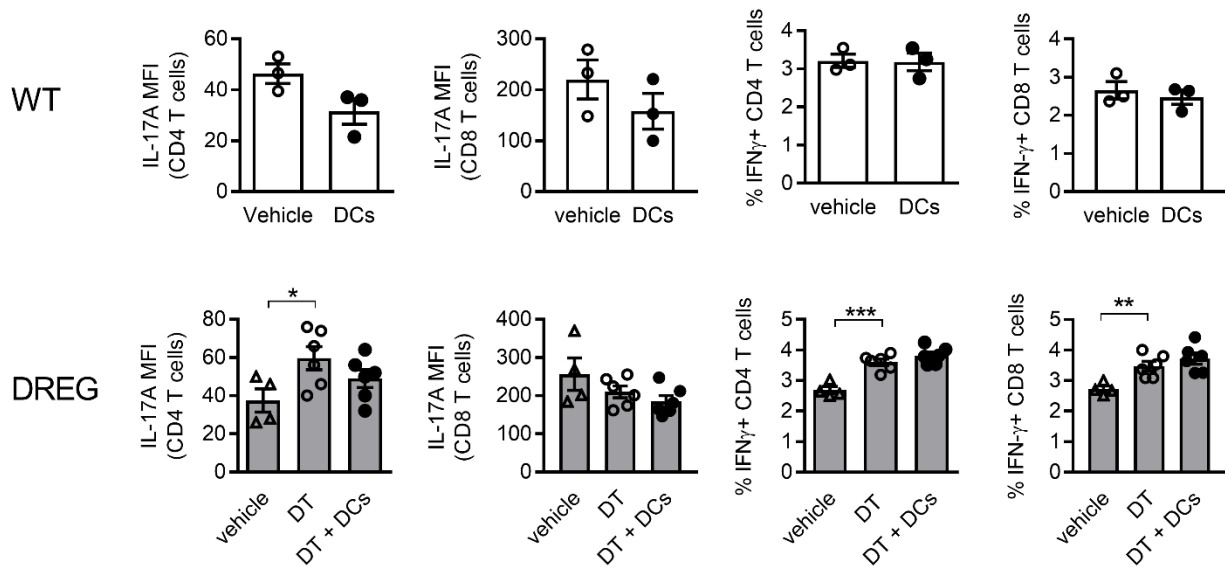

**Supplemental Figure 3.** T cell cytokine production in wildtype or Treg-depleted DREG mice receiving vehicle or MPO/BAY DCs. Wildtype (WT) or DREG mice were immunised with MPO/adjuvant (days 0 and 7). DREG mice received vehicle (saline; n = 4) or diphtheria toxin (DT; n = 6/group) on days 12-14 to deplete Tregs. Vehicle (saline) or BAY-treated MPO-pulsed DCs (MPO/BAY DCs) were administered to Treg-intact WT (saline, n = 3; DCs, n = 3) or DT-treated (Treg-depleted) DREG mice on day 14. CD4 and CD8 expression of IL-17A (MFI) and the proportion of IFN $\gamma$ + CD4 and CD8 T cells was assessed on day 18 by flow cytometry using lymph node cells re-stimulated with MPO for 48 hours. Data are presented as scatter plots with the mean  $\pm$  SEM. \*  $P < 0.05$ , \*\*  $P < 0.01$ , \*\*\*  $P < 0.001$ .

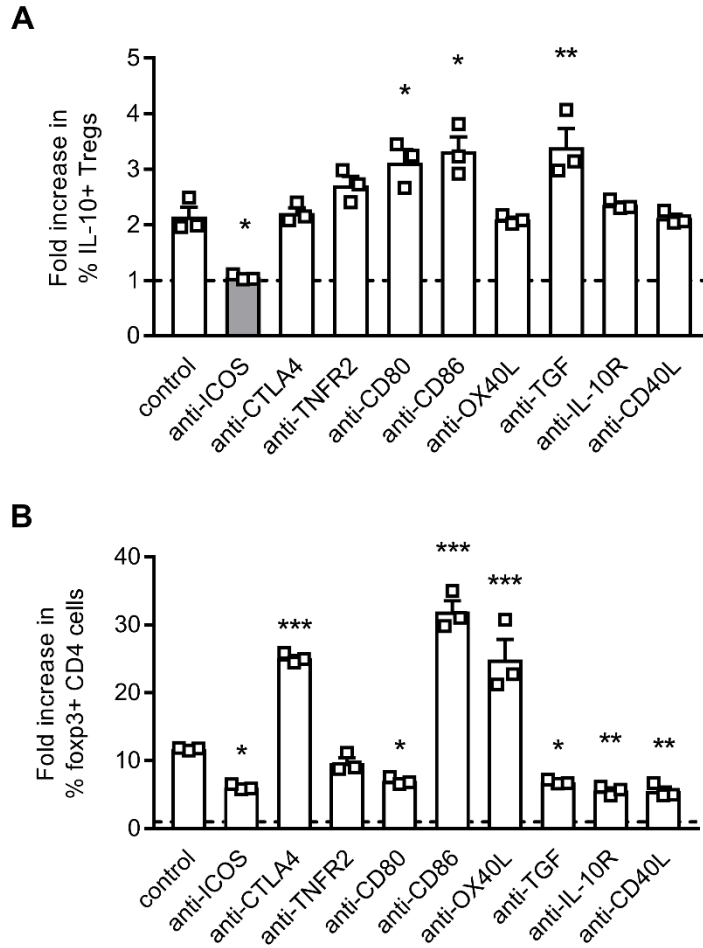

**Supplemental Figure 4.** The mechanisms by which MPO/BAY DCs regulate Treg responses. Tregs (CD4+foxp3+ cells) or CD4+foxp3- cells, isolated from MPO-immunised foxp3-GFP mice, were co-cultured with or without MPO/BAY DCs and LPS for 48 hours, in the presence of control IgG or blocking antibodies against ICOS, CTLA4, TNFR2, CD80, CD86, OX40L, TGF $\beta$ , IL-10R or CD40L. IL-10 expression by Tregs (in DC/Treg co-cultures) and the generation of CD4+foxp3+ from CD4+foxp3- cells (in DC/CD4+foxp3- co-cultures) was assessed by flow cytometry. (A) Fold increase in the percentage of IL-10+ Tregs by MPO/BAY DCs. (B) Fold increase in the percentage of newly generated CD4+foxp3+ cells by MPO/BAY DCs. The dotted lines represent fold increase of 1 (i.e. no increase in the percentage of IL-10+ cells and no increase in the percentage of CD4+foxp3+ cells). Data are presented as scatter plots with the mean  $\pm$  SEM. \*  $P < 0.05$ , \*\*  $P < 0.01$ , \*\*\*  $P < 0.001$  (all  $P$  values are *versus* 'control').

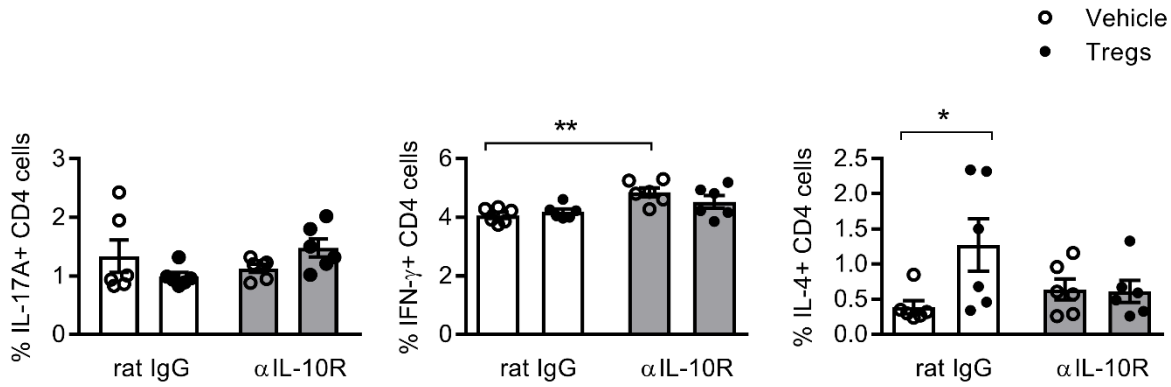

**Supplemental Figure 5.** The effect of MPO/BAY DC-induced Tregs, in the presence or absence of an IL-10R antibody, on cytokine production by CD4 T cells. BAY-treated MPO-pulsed DCs (MPO/BAY DCs) were administered to MPO-immunised foxp3-GFP mice on day 14 and Tregs (CD4+foxp3/GFP+ cells) isolated on day 28. Then, vehicle (saline; n = 6/group) or BAY DC-induced Tregs (n = 6/group), and either control rat IgG or a blocking IL-10 receptor (IL-10R) antibody, were given to mice with established anti-MPO immunity (day 17). GN was triggered on day 21. On day 26, cytokine production by MPO-restimulated lymph node cells was measured by flow cytometry to determine the proportion of CD4 T cells expressing IL-17A, IFN $\gamma$  or IL-4. Data is presented as scatter plots with the mean  $\pm$  SEM \*  $P < 0.05$ , \*\*  $P < 0.01$ , \*\*\*  $P < 0.001$ .
